# Supplementary material
Source: publisher figshare collection journal article supplement (https://asha.figshare.com/articles/dataset/_/20468928)
Supplement: Supplementary file 2 [file 1]

## Supplemental Material S2. Search strategies and yields for electronic databases.

| Database                     | Search Strategy                                                                                                                               | Yield |
|------------------------------|-----------------------------------------------------------------------------------------------------------------------------------------------|-------|
| <b>PubMed</b>                | MeSH (“Developmental Disabilities”) and (“Communication aids for Disabled”)                                                                   | 66    |
|                              | MeSH (“Down syndrome”) and ((“Communication aids for Disabled”) or (“Augmentative and Alternative Communication”))                            | 7     |
|                              | MeSH Rett Syndrome”) and ((“Communication aids for Disabled”) or (“Augmentative and Alternative Communication”))                              | 2     |
|                              | MeSH (“Cerebral palsy”) and ((“Communication aids for Disabled”) or (“Augmentative and Alternative Communication”))                           | 75    |
|                              | MeSH (“Fragile X Syndrome”) and ((“Communication aids for Disabled”) or (“Augmentative and Alternative Communication”))                       | 0     |
|                              | MeSH (“Intellectual disability”) and ((“Communication aids for Disabled”) or (“Augmentative and Alternative Communication”))                  | 93    |
|                              |                                                                                                                                               |       |
| <b>PsychINFO (EBSCOhost)</b> | SU “Developmental Disabilities” AND TI (“AAC” OR “Augmentative and Alternative Communication”) – (peer-reviewed as limiter)                   | 63    |
|                              | SU “Developmental Disabilities” AND AB (“AAC” OR “Augmentative and Alternative Communication”) – (peer reviewed as limiter)                   | 94    |
|                              | SU “Developmental disabilities” AND TI (“Speech Generating Device” OR “SGD” OR “voice output communication aid”) - (peer-reviewed as limiter) | 6     |
|                              | SU “Developmental disabilities” AND AB (“Speech Generating Device” OR “SGD” OR “voice output communication aid”) - (peer-reviewed as limiter) | 25    |
|                              | SU “Developmental disabilities” AND TI (“mobile technology” OR “iPad” OR “tablet”) - (peer-reviewed as limiter)                               | 14    |
|                              | SU “Developmental disabilities” AND AB (“mobile technology” OR “iPad” OR “tablet”) - (peer-reviewed as limiter)                               | 44    |
|                              |                                                                                                                                               |       |
|                              | SU “Mental Retardation” AND TI (“AAC” OR “Augmentative and Alternative Communication”) – (peer-reviewed as limiter)                           | 23    |
|                              | SU “Mental Retardation” AND AB (“AAC” OR “Augmentative and Alternative Communication”) – (peer reviewed as limiter)                           | 43    |

|  |                                                                                                                                        |    |
|--|----------------------------------------------------------------------------------------------------------------------------------------|----|
|  | SU “Mental Retardation” AND TI (“Speech Generating Device” OR “SGD” OR “voice output communication aid”) - (peer-reviewed as limiter)  | 4  |
|  | SU “Mental Retardation” AND AB (“Speech Generating Device” OR “SGD” OR “voice output communication aid”) - (peer-reviewed as limiter)) | 9  |
|  | SU “Mental Retardation” AND TI (“mobile technology” OR “iPad” OR “tablet”)- (peer-reviewed as limiter)                                 | 7  |
|  | SU “Mental retardation” AND AB (“mobile technology” OR “iPad” OR “tablet”)- (peer-reviewed as limiter)                                 | 20 |
|  | SU “Down syndrome” AND TI (“AAC” OR “Augmentative and Alternative Communication”) – (peer-reviewed as limiter)                         | 4  |
|  | SU “Down syndrome” AND AB (“AAC” OR “Augmentative and Alternative Communication”) – (peer reviewed as limiter)                         | 12 |
|  | SU “Down syndrome” AND TI (“Speech Generating Device” OR “SGD” OR “voice output communication aid”) - (peer-reviewed as limiter)       | 0  |
|  | SU “Down syndrome” AND AB (“Speech Generating Device” OR “SGD” OR “voice output communication aid”) - (peer-reviewed as limiter)       | 2  |
|  | SU “Down Syndrome” AND TI (“mobile technology” OR “iPad” OR “tablet”)- (peer-reviewed as limiter)                                      | 0  |
|  | SU “Down Syndrome” AND AB (“mobile technology” OR “iPad” OR “tablet”)- (peer-reviewed as limiter)                                      | 5  |
|  | SU “Rett syndrome” AND TI (“AAC” OR “Augmentative and Alternative Communication”) – (peer-reviewed as limiter)                         | 3  |
|  | SU “Rett syndrome” AND AB (“AAC” OR “Augmentative and Alternative Communication”) – (peer-reviewed as limiter)                         | 7  |
|  | SU “Rett syndrome” AND TI (“Speech Generating Device” OR “SGD” OR “voice output communication aid”)- (peer-reviewed as limiter)        | 0  |
|  | SU “Rett syndrome” AND AB (“Speech Generating Device” OR “SGD” OR “voice output communication aid”)- (peer-reviewed as limiter)        | 0  |
|  | SU “Rett Syndrome” AND TI (“mobile technology” OR “iPad” OR “tablet”)- (peer-reviewed as limiter)                                      | 1  |
|  | SU “Rett Syndrome” AND AB (“mobile technology” OR “iPad” OR “tablet”)- (peer-reviewed as limiter)                                      | 0  |

|  |                                                                                                                                                   |     |
|--|---------------------------------------------------------------------------------------------------------------------------------------------------|-----|
|  | SU "Cerebral palsy" AND TI ("AAC" OR "Augmentative and Alternative Communication") - (peer-reviewed as limiter)                                   | 57  |
|  | SU "Cerebral palsy" AND AB ("AAC" OR "Augmentative and Alternative Communication") - (peer-reviewed as limiter)                                   | 102 |
|  | SU "Cerebral Palsy" AND TI ("Speech Generating Device" OR "SGD" OR "voice output communication aid") - (peer-reviewed as limiter)                 | 2   |
|  | SU "Cerebral Palsy" AND AB ("Speech Generating Device" OR "SGD" OR "voice output communication aid") - (peer-reviewed as limiter)                 | 14  |
|  | SU "Cerebral Palsy" AND TI ("mobile technology" OR "iPad" OR "tablet")- (peer-reviewed as limiter)                                                | 1   |
|  | SU "Cerebral Palsy" AND AB ("mobile technology" OR "iPad" OR "tablet")- (peer-reviewed as limiter)                                                | 9   |
|  |                                                                                                                                                   |     |
|  | SU "Fragile X Syndrome" AND TI ("AAC" OR "Augmentative and Alternative Communication") - (peer-reviewed as limiter)                               | 0   |
|  | SU "Fragile X Syndrome" AND AB ("AAC" OR "Augmentative and Alternative Communication") - (peer-reviewed as limiter)                               | 2   |
|  | SU "Fragile X Syndrome" AND TI ("Speech Generating Device" OR "SGD" OR "voice output communication aid") - (peer-reviewed as limiter)             | 0   |
|  | SU "Fragile X Syndrome" AND AB ("Speech Generating Device" OR "SGD" OR "voice output communication aid") - (peer-reviewed as limiter)             | 0   |
|  | SU "Fragile X Syndrome" AND TI ("mobile technology" OR "iPad" OR "tablet")- (peer-reviewed as limiter)                                            | 2   |
|  | SU "Fragile X Syndrome" AND AB ("mobile technology" OR "iPad" OR "tablet")- (peer-reviewed as limiter)                                            | 3   |
|  |                                                                                                                                                   |     |
|  | SU "Speech and Language Impairment" AND TI ("AAC" OR "Augmentative and Alternative Communication") - (peer-reviewed as limiter)                   | 0   |
|  | SU "Speech and Language Impairment" AND AB ("AAC" OR "Augmentative and Alternative Communication") - (peer-reviewed as limiter)                   | 0   |
|  | SU "Speech and Language Impairment" AND TI ("Speech Generating Device" OR "SGD" OR "voice output communication aid") - (peer-reviewed as limiter) | 0   |
|  | SU "Speech and Language Impairment" AND AB ("Speech Generating Device" OR "SGD" OR "voice output communication aid") - (peer-reviewed as limiter) | 0   |

|  |                                                                                                                                            |    |
|--|--------------------------------------------------------------------------------------------------------------------------------------------|----|
|  | output communication aid”) - (peer-reviewed as limiter)                                                                                    |    |
|  | SU “Speech and Language Impairment” AND TI (“mobile technology” OR “iPad” OR “tablet”)- (peer-reviewed as limiter)                         | 0  |
|  | SU “Speech and Language Impairment” AND AB (“mobile technology” OR “iPad” OR “tablet”)- (peer-reviewed as limiter)                         | 0  |
|  | SU “Apraxia of Speech” AND TI (“AAC” OR “Augmentative and Alternative Communication”) - (peer-reviewed as limiter)                         | 3  |
|  | SU “Apraxia of Speech” AND AB (“AAC” OR “Augmentative and Alternative Communication”) - (peer-reviewed as limiter)                         | 5  |
|  | SU “Apraxia of Speech” AND TI (“Speech Generating Device” OR “SGD” OR “voice output communication aid”) - (peer-reviewed as limiter)       | 0  |
|  | SU “Apraxia of Speech” AND AB (“Speech Generating Device” OR “SGD” OR “voice output communication aid”) - (peer-reviewed as limiter)       | 1  |
|  | SU “Apraxia of Speech” AND TI (“mobile technology” OR “iPad” OR “tablet”)- (peer-reviewed as limiter)                                      | 0  |
|  | SU “Apraxia of Speech” AND AB (“mobile technology” OR “iPad” OR “tablet”)- (peer-reviewed as limiter)                                      | 0  |
|  | SU “Intellectual disability” AND TI (“AAC” OR “Augmentative and Alternative Communication”) - (peer-reviewed as limiter)                   | 21 |
|  | SU “Intellectual disability” AND AB (“AAC” OR “Augmentative and Alternative Communication”) - (peer-reviewed as limiter)                   | 41 |
|  | SU “Intellectual disability” AND TI (“Speech Generating Device” OR “SGD” OR “voice output communication aid”) - (peer-reviewed as limiter) | 4  |
|  | SU “Intellectual disability” AND AB (“Speech Generating Device” OR “SGD” OR “voice output communication aid”) - (peer-reviewed as limiter) | 13 |
|  | SU “Intellectual disability” AND TI (“mobile technology” OR “iPad” OR “tablet”)- (peer-reviewed as limiter)                                | 14 |
|  | SU “Intellectual disability” AND AB (“mobile technology” OR “iPad” OR “tablet”)- (peer-reviewed as limiter)                                | 37 |
|  | SU “Profound disabilities” AND TI (“AAC” OR “Augmentative and Alternative Communication”) - (peer-reviewed as limiter)                     | 1  |

|                           |                                                                                                                                               |    |
|---------------------------|-----------------------------------------------------------------------------------------------------------------------------------------------|----|
|                           | SU "Profound disabilities" AND AB ("AAC" OR "Augmentative and Alternative Communication") - (peer-reviewed as limiter)                        | 1  |
|                           | SU "Profound disabilities" AND TI ("Speech Generating Device" OR "SGD" OR "voice output communication aid") - (peer-reviewed as limiter)      | 0  |
|                           | SU "Profound disabilities" AND AB ("Speech Generating Device" OR "SGD" OR "voice output communication aid") - (peer-reviewed as limiter)      | 0  |
|                           | SU "Profound disabilities" AND TI ("mobile technology" OR "iPad" OR "tablet")- (peer-reviewed as limiter)                                     | 0  |
|                           | SU "Profound disabilities" AND AB ("mobile technology" OR "iPad" OR "tablet")- (peer-reviewed as limiter)                                     | 0  |
|                           | SU "Multiple disabilities" AND TI ("AAC" OR "Augmentative and Alternative Communication") - (peer-reviewed as limiter)                        | 5  |
|                           | SU "Multiple disabilities" AND AB ("AAC" OR "Augmentative and Alternative Communication") - (peer-reviewed as limiter)                        | 14 |
|                           | SU "Multiple disabilities" AND TI ("Speech Generating Device" OR "SGD" OR "voice output communication aid") - (peer-reviewed as limiter)      | 3  |
|                           | SU "Multiple disabilities" AND AB ("Speech Generating Device" OR "SGD" OR "voice output communication aid") - (peer-reviewed as limiter)      | 12 |
|                           | SU "Multiple disabilities" AND TI ("mobile technology" OR "iPad" OR "tablet")- (peer-reviewed as limiter)                                     | 2  |
|                           | SU "Multiple disabilities" AND AB ("mobile technology" OR "iPad" OR "tablet")- (peer-reviewed as limiter)                                     | 4  |
| <b>CINAHL (EBSCOhost)</b> | SU "Developmental Disabilities" AND TI ("AAC" OR "Augmentative and Alternative Communication") – (peer-reviewed as limiter)                   | 56 |
|                           | SU "Developmental Disabilities" AND AB ("AAC" OR "Augmentative and Alternative Communication") – (peer reviewed as limiter)                   | 68 |
|                           | SU "Developmental disabilities" AND TI ("Speech Generating Device" OR "SGD" OR "voice output communication aid") - (peer-reviewed as limiter) | 4  |
|                           | SU "Developmental disabilities" AND AB ("Speech Generating Device" OR "SGD" OR "voice output communication aid") - (peer-reviewed as limiter) | 18 |

|  |                                                                                                                                       |    |
|--|---------------------------------------------------------------------------------------------------------------------------------------|----|
|  | SU “Developmental disabilities” AND TI (“mobile technology” OR “iPad” OR “tablet”) - (peer-reviewed as limiter)                       | 11 |
|  | SU “Developmental disabilities” AND AB (“mobile technology” OR “iPad” OR “tablet”) - (peer-reviewed as limiter)                       | 26 |
|  | SU “Mental Retardation” AND TI (“AAC” OR “Augmentative and Alternative Communication”) – (peer-reviewed as limiter)                   | 1  |
|  | SU “Mental Retardation” AND AB (“AAC” OR “Augmentative and Alternative Communication”) – (peer reviewed as limiter)                   | 1  |
|  | SU “Mental Retardation” AND TI (“Speech Generating Device” OR “SGD” OR “voice output communication aid”) - (peer-reviewed as limiter) | 0  |
|  | SU “Mental Retardation” AND AB (“Speech Generating Device” OR “SGD” OR “voice output communication aid”) - (peer-reviewed as limiter) | 0  |
|  | SU “Mental Retardation” AND TI (“mobile technology” OR “iPad” OR “tablet”)- (peer-reviewed as limiter)                                | 0  |
|  | SU “Mental retardation” AND AB (“mobile technology” OR “iPad” OR “tablet”)- (peer-reviewed as limiter)                                | 0  |
|  | SU “Down syndrome” AND TI (“AAC” OR “Augmentative and Alternative Communication”) – (peer-reviewed as limiter)                        | 15 |
|  | SU “Down syndrome” AND AB (“AAC” OR “Augmentative and Alternative Communication”) – (peer reviewed as limiter)                        | 18 |
|  | SU “Down syndrome” AND TI (“Speech Generating Device” OR “SGD” OR “voice output communication aid”)- (peer-reviewed as limiter)       | 2  |
|  | SU “Down syndrome” AND AB (“Speech Generating Device” OR “SGD” OR “voice output communication aid”)- (peer-reviewed as limiter)       | 3  |
|  | SU “Down Syndrome” AND TI (“mobile technology” OR “iPad” OR “tablet”)- (peer-reviewed as limiter)                                     | 0  |
|  | SU “Down Syndrome” AND AB (“mobile technology” OR “iPad” OR “tablet”)- (peer-reviewed as limiter)                                     | 1  |
|  | SU “Rett syndrome” AND TI (“AAC” OR “Augmentative and Alternative Communication”) – (peer-reviewed as limiter)                        | 3  |
|  | SU “Rett syndrome” AND AB (“AAC” OR “Augmentative and Alternative Communication”) – (peer-reviewed as limiter)                        | 7  |

|  |                                                                                                                                       |     |
|--|---------------------------------------------------------------------------------------------------------------------------------------|-----|
|  | SU "Rett syndrome" AND TI ("Speech Generating Device" OR "SGD" OR "voice output communication aid") - (peer-reviewed as limiter)      | 0   |
|  | SU "Rett syndrome" AND AB ("Speech Generating Device" OR "SGD" OR "voice output communication aid")- (peer-reviewed as limiter)       | 0   |
|  | SU "Rett Syndrome" AND TI ("mobile technology" OR "iPad" OR "tablet")- (peer-reviewed as limiter)                                     | 0   |
|  | SU "Rett Syndrome" AND AB ("mobile technology" OR "iPad" OR "tablet")- (peer-reviewed as limiter)                                     | 0   |
|  | SU "Cerebral Palsy" AND TI ("AAC" OR "Augmentative and Alternative Communication") - (peer-reviewed as limiter)                       | 77  |
|  | SU "Cerebral Palsy" AND AB ("AAC" OR "Augmentative and Alternative Communication") - (peer-reviewed as limiter)                       | 115 |
|  | SU "Cerebral Palsy" AND TI ("Speech Generating Device" OR "SGD" OR "voice output communication aid") - (peer-reviewed as limiter)     | 2   |
|  | SU "Cerebral Palsy" AND AB ("Speech Generating Device" OR "SGD" OR "voice output communication aid") - (peer-reviewed as limiter)     | 19  |
|  | SU "Cerebral Palsy" AND TI ("mobile technology" OR "iPad" OR "tablet")- (peer-reviewed as limiter)                                    | 4   |
|  | SU "Cerebral Palsy" AND AB ("mobile technology" OR "iPad" OR "tablet")- (peer-reviewed as limiter)                                    | 6   |
|  |                                                                                                                                       |     |
|  | SU "Fragile X Syndrome" AND TI ("AAC" OR "Augmentative and Alternative Communication") - (peer-reviewed as limiter)                   | 2   |
|  | SU "Fragile X Syndrome" AND AB ("AAC" OR "Augmentative and Alternative Communication") - (peer-reviewed as limiter)                   | 3   |
|  | SU "Fragile X Syndrome" AND TI ("Speech Generating Device" OR "SGD" OR "voice output communication aid") - (peer-reviewed as limiter) | 0   |
|  | SU "Fragile X Syndrome" AND AB ("Speech Generating Device" OR "SGD" OR "voice output communication aid") - (peer-reviewed as limiter) | 0   |
|  | SU "Fragile X Syndrome" AND TI ("mobile technology" OR "iPad" OR "tablet") - (peer-reviewed as limiter)                               | 1   |
|  | SU "Fragile X Syndrome" AND AB ("mobile technology" OR "iPad" OR "tablet") - (peer-reviewed as limiter)                               | 1   |
|  |                                                                                                                                       |     |

|  |                                                                                                                                                   |    |
|--|---------------------------------------------------------------------------------------------------------------------------------------------------|----|
|  | SU "Speech and Language Impairment" AND TI ("AAC" OR "Augmentative and Alternative Communication") - (peer-reviewed as limiter)                   | 0  |
|  | SU "Speech and Language Impairment" AND AB ("AAC" OR "Augmentative and Alternative Communication") - (peer-reviewed as limiter)                   | 0  |
|  | SU "Speech and Language Impairment" AND TI ("Speech Generating Device" OR "SGD" OR "voice output communication aid") - (peer-reviewed as limiter) | 0  |
|  | SU "Speech and Language Impairment" AND AB ("Speech Generating Device" OR "SGD" OR "voice output communication aid") - (peer-reviewed as limiter) | 0  |
|  | SU "Speech and Language Impairment" AND TI ("mobile technology" OR "iPad" OR "tablet") - (peer-reviewed as limiter)                               | 0  |
|  | SU "Speech and Language Impairment" AND AB ("mobile technology" OR "iPad" OR "tablet") - (peer-reviewed as limiter)                               | 0  |
|  |                                                                                                                                                   |    |
|  | SU "Apraxia of Speech" AND TI ("AAC" OR "Augmentative and Alternative Communication") - (peer-reviewed as limiter)                                | 8  |
|  | SU "Apraxia of Speech" AND AB ("AAC" OR "Augmentative and Alternative Communication") - (peer-reviewed as limiter)                                | 10 |
|  | SU "Apraxia of Speech" AND TI ("Speech Generating Device" OR "SGD" OR "voice output communication aid") - (peer-reviewed as limiter)              | 1  |
|  | SU "Apraxia of Speech" AND AB ("Speech Generating Device" OR "SGD" OR "voice output communication aid") - (peer-reviewed as limiter)              | 3  |
|  | SU "Apraxia of Speech" AND TI ("mobile technology" OR "iPad" OR "tablet") - (peer-reviewed as limiter)                                            | 1  |
|  | SU "Apraxia of Speech" AND AB ("mobile technology" OR "iPad" OR "tablet") - (peer-reviewed as limiter)                                            | 1  |
|  | SU "Intellectual disability" AND TI ("AAC" OR "Augmentative and Alternative Communication") - (peer-reviewed as limiter)                          | 37 |
|  | SU "Intellectual disability" AND AB ("AAC" OR "Augmentative and Alternative Communication") - (peer-reviewed as limiter)                          | 56 |
|  | SU "Intellectual disability" AND TI ("Speech Generating Device" OR "SGD" OR "voice output communication aid") - (peer-reviewed as limiter)        | 4  |



|  |                                                                                                                                            |    |
|--|--------------------------------------------------------------------------------------------------------------------------------------------|----|
|  | SU "Intellectual disability" AND AB ("Speech Generating Device" OR "SGD" OR "voice output communication aid") - (peer-reviewed as limiter) | 12 |
|  | SU "Intellectual disability" AND TI ("mobile technology" OR "iPad" OR "tablet") - (peer-reviewed as limiter)                               | 16 |
|  | SU "Intellectual disability" AND AB ("mobile technology" OR "iPad" OR "tablet") - (peer-reviewed as limiter)                               | 30 |
|  | SU "Profound disabilities" AND TI ("AAC" OR "Augmentative and Alternative Communication") - (peer-reviewed as limiter)                     | 0  |
|  | SU "Profound disabilities" AND AB ("AAC" OR "Augmentative and Alternative Communication") - (peer-reviewed as limiter)                     | 0  |
|  | SU "Profound disabilities" AND TI ("Speech Generating Device" OR "SGD" OR "voice output communication aid") - (peer-reviewed as limiter)   | 0  |
|  | SU "Profound disabilities" AND AB ("Speech Generating Device" OR "SGD" OR "voice output communication aid") - (peer-reviewed as limiter)   | 0  |
|  | SU "Profound disabilities" AND TI ("mobile technology" OR "iPad" OR "tablet") - (peer-reviewed as limiter)                                 | 0  |
|  | SU "Profound disabilities" AND AB ("mobile technology" OR "iPad" OR "tablet") - (peer-reviewed as limiter)                                 | 0  |
|  | SU "Multiple disabilities" AND TI ("AAC" OR "Augmentative and Alternative Communication") - (peer-reviewed as limiter)                     | 0  |
|  | SU "Multiple disabilities" AND AB ("AAC" OR "Augmentative and Alternative Communication") - (peer-reviewed as limiter)                     | 0  |
|  | SU "Multiple disabilities" AND TI ("Speech Generating Device" OR "SGD" OR "voice output communication aid") - (peer-reviewed as limiter)   | 0  |
|  | SU "Multiple disabilities" AND AB ("Speech Generating Device" OR "SGD" OR "voice output communication aid") - (peer-reviewed as limiter)   | 0  |
|  | SU "Multiple disabilities" AND TI ("mobile technology" OR "iPad" OR "tablet") - (peer-reviewed as limiter)                                 | 0  |
|  | SU "Multiple disabilities" AND AB ("mobile technology" OR "iPad" OR "tablet") - (peer-reviewed as limiter)                                 | 0  |

|                         |                                                                                                                                               |    |
|-------------------------|-----------------------------------------------------------------------------------------------------------------------------------------------|----|
| <b>ERIC (EBSCOhost)</b> | SU “Developmental Disabilities” AND TI (“AAC” OR “Augmentative and Alternative Communication”) – (peer-reviewed as limiter)                   | 22 |
|                         | SU “Developmental Disabilities” AND AB (“AAC” OR “Augmentative and Alternative Communication”) – (peer reviewed as limiter)                   | 30 |
|                         | SU “Developmental disabilities” AND TI (“Speech Generating Device” OR “SGD” OR “voice output communication aid”) - (peer-reviewed as limiter) | 2  |
|                         | SU “Developmental disabilities” AND AB (“Speech Generating Device” OR “SGD” OR “voice output communication aid”) - (peer-reviewed as limiter) | 6  |
|                         | SU “Developmental disabilities” AND TI (“mobile technology” OR “iPad” OR “tablet”) - (peer-reviewed as limiter)                               | 16 |
|                         | SU “Developmental disabilities” AND AB (“mobile technology” OR “iPad” OR “tablet”) - (peer-reviewed as limiter)                               | 24 |
|                         |                                                                                                                                               |    |
|                         | SU “Mental Retardation” AND TI (“AAC” OR “Augmentative and Alternative Communication”) – (peer-reviewed as limiter)                           | 10 |
|                         | SU “Mental Retardation” AND AB (“AAC” OR “Augmentative and Alternative Communication”) – (peer reviewed as limiter)                           | 24 |
|                         | SU “Mental Retardation” AND TI (“Speech Generating Device” OR “SGD” OR “voice output communication aid”) - (peer-reviewed as limiter)         | 2  |
|                         | SU “Mental Retardation” AND AB (“Speech Generating Device” OR “SGD” OR “voice output communication aid”) - (peer-reviewed as limiter)         | 7  |
|                         | SU “Mental Retardation” AND TI (“mobile technology” OR “iPad” OR “tablet”) - (peer-reviewed as limiter)                                       | 5  |
|                         | SU “Mental retardation” AND AB (“mobile technology” OR “iPad” OR “tablet”) - (peer-reviewed as limiter)                                       | 9  |
|                         |                                                                                                                                               |    |
|                         | SU “Down syndrome” AND TI (“AAC” OR “Augmentative and Alternative Communication”) – (peer-reviewed as limiter)                                | 3  |
|                         | SU “Down syndrome” AND AB (“AAC” OR “Augmentative and Alternative Communication”) – (peer reviewed as limiter)                                | 6  |
|                         | SU “Down syndrome” AND TI (“Speech Generating Device” OR “SGD” OR “voice output communication aid”) - (peer-reviewed as limiter)              | 0  |

|  |                                                                                                                                   |   |
|--|-----------------------------------------------------------------------------------------------------------------------------------|---|
|  | SU "Down syndrome" AND AB ("Speech Generating Device" OR "SGD" OR "voice output communication aid") - (peer-reviewed as limiter)  | 0 |
|  | SU "Down Syndrome" AND TI ("mobile technology" OR "iPad" OR "tablet") - (peer-reviewed as limiter)                                | 0 |
|  | SU "Down Syndrome" AND AB ("mobile technology" OR "iPad" OR "tablet") - (peer-reviewed as limiter)                                | 1 |
|  | SU "Rett syndrome" AND TI ("AAC" OR "Augmentative and Alternative Communication") – (peer-reviewed as limiter)                    | 0 |
|  | SU "Rett syndrome" AND AB ("AAC" OR "Augmentative and Alternative Communication") – (peer-reviewed as limiter)                    | 0 |
|  | SU "Rett syndrome" AND TI ("Speech Generating Device" OR "SGD" OR "voice output communication aid") - (peer-reviewed as limiter)  | 0 |
|  | SU "Rett syndrome" AND AB ("Speech Generating Device" OR "SGD" OR "voice output communication aid") - (peer-reviewed as limiter)  | 0 |
|  | SU "Rett Syndrome" AND TI ("mobile technology" OR "iPad" OR "tablet") - (peer-reviewed as limiter)                                | 0 |
|  | SU "Rett Syndrome" AND AB ("mobile technology" OR "iPad" OR "tablet") - (peer-reviewed as limiter)                                | 0 |
|  | SU "Cerebral palsy" AND TI ("AAC" OR "Augmentative and Alternative Communication") - (peer-reviewed as limiter)                   | 9 |
|  | SU "Cerebral palsy" AND AB ("AAC" OR "Augmentative and Alternative Communication") - (peer-reviewed as limiter)                   | 0 |
|  | SU "Cerebral Palsy" AND TI ("Speech Generating Device" OR "SGD" OR "voice output communication aid") - (peer-reviewed as limiter) | 0 |
|  | SU "Cerebral Palsy" AND AB ("Speech Generating Device" OR "SGD" OR "voice output communication aid") - (peer-reviewed as limiter) | 0 |
|  | SU "Cerebral Palsy" AND TI ("mobile technology" OR "iPad" OR "tablet") - (peer-reviewed as limiter)                               | 1 |
|  | SU "Cerebral Palsy" AND AB ("mobile technology" OR "iPad" OR "tablet") - (peer-reviewed as limiter)                               | 1 |
|  | SU "Fragile X Syndrome" AND TI ("AAC" OR "Augmentative and Alternative Communication") - (peer-reviewed as limiter)               | 0 |
|  | SU "Fragile X Syndrome" AND AB ("AAC" OR "Augmentative and Alternative Communication") - (peer-reviewed as limiter)               | 0 |

|  |                                                                                                                                                   |   |
|--|---------------------------------------------------------------------------------------------------------------------------------------------------|---|
|  | SU "Fragile X Syndrome" AND TI ("Speech Generating Device" OR "SGD" OR "voice output communication aid") - (peer-reviewed as limiter)             | 0 |
|  | SU "Fragile X Syndrome" AND AB ("Speech Generating Device" OR "SGD" OR "voice output communication aid") - (peer-reviewed as limiter)             | 0 |
|  | SU "Fragile X Syndrome" AND TI ("mobile technology" OR "iPad" OR "tablet") - (peer-reviewed as limiter)                                           | 0 |
|  | SU "Fragile X Syndrome" AND AB ("mobile technology" OR "iPad" OR "tablet") - (peer-reviewed as limiter)                                           | 0 |
|  | SU "Speech and Language Impairment" AND TI ("AAC" OR "Augmentative and Alternative Communication") - (peer-reviewed as limiter)                   | 0 |
|  | SU "Speech and Language Impairment" AND AB ("AAC" OR "Augmentative and Alternative Communication") - (peer-reviewed as limiter)                   | 0 |
|  | SU "Speech and Language Impairment" AND TI ("Speech Generating Device" OR "SGD" OR "voice output communication aid") - (peer-reviewed as limiter) | 0 |
|  | SU "Speech and Language Impairment" AND AB ("Speech Generating Device" OR "SGD" OR "voice output communication aid") - (peer-reviewed as limiter) | 0 |
|  | SU "Speech and Language Impairment" AND TI ("mobile technology" OR "iPad" OR "tablet") - (peer-reviewed as limiter)                               | 0 |
|  | SU "Speech and Language Impairment" AND AB ("mobile technology" OR "iPad" OR "tablet") - (peer-reviewed as limiter)                               | 0 |
|  | SU "Apraxia of Speech" AND TI ("AAC" OR "Augmentative and Alternative Communication") - (peer-reviewed as limiter)                                | 0 |
|  | SU "Apraxia of Speech" AND AB ("AAC" OR "Augmentative and Alternative Communication") - (peer-reviewed as limiter)                                | 0 |
|  | SU "Apraxia of Speech" AND TI ("Speech Generating Device" OR "SGD" OR "voice output communication aid") - (peer-reviewed as limiter)              | 0 |
|  | SU "Apraxia of Speech" AND AB ("Speech Generating Device" OR "SGD" OR "voice output communication aid") - (peer-reviewed as limiter)              | 0 |
|  | SU "Apraxia of Speech" AND TI ("mobile technology" OR "iPad" OR "tablet") - (peer-reviewed as limiter)                                            | 0 |

|  |                                                                                                                                            |    |
|--|--------------------------------------------------------------------------------------------------------------------------------------------|----|
|  | SU “Apraxia of Speech” AND AB (“mobile technology” OR “iPad” OR “tablet”)- (peer-reviewed as limiter)                                      | 0  |
|  | SU “Intellectual disability” AND TI (“AAC” OR “Augmentative and Alternative Communication”) - (peer-reviewed as limiter)                   | 10 |
|  | SU “Intellectual disability” AND AB (“AAC” OR “Augmentative and Alternative Communication”) - (peer-reviewed as limiter)                   | 16 |
|  | SU “Intellectual disability” AND TI (“Speech Generating Device” OR “SGD” OR “voice output communication aid”) - (peer-reviewed as limiter) | 1  |
|  | SU “Intellectual disability” AND AB (“Speech Generating Device” OR “SGD” OR “voice output communication aid”) - (peer-reviewed as limiter) | 3  |
|  | SU “Intellectual disability” AND TI (“mobile technology” OR “iPad” OR “tablet”) - (peer-reviewed as limiter)                               | 11 |
|  | SU “Intellectual disability” AND AB (“mobile technology” OR “iPad” OR “tablet”) - (peer-reviewed as limiter)                               | 18 |
|  | SU “Profound disabilities” AND TI (“AAC” OR “Augmentative and Alternative Communication”) - (peer-reviewed as limiter)                     | 0  |
|  | SU “Profound disabilities” AND AB (“AAC” OR “Augmentative and Alternative Communication”) - (peer-reviewed as limiter)                     | 0  |
|  | SU “Profound disabilities” AND TI (“Speech Generating Device” OR “SGD” OR “voice output communication aid”) - (peer-reviewed as limiter)   | 0  |
|  | SU “Profound disabilities” AND AB (“Speech Generating Device” OR “SGD” OR “voice output communication aid”) - (peer-reviewed as limiter)   | 0  |
|  | SU “Profound disabilities” AND TI (“mobile technology” OR “iPad” OR “tablet”) - (peer-reviewed as limiter)                                 | 0  |
|  | SU “Profound disabilities” AND AB (“mobile technology” OR “iPad” OR “tablet”) - (peer-reviewed as limiter)                                 | 0  |
|  | SU “Multiple disabilities” AND TI (“AAC” OR “Augmentative and Alternative Communication”) – (peer-reviewed as limiter)                     | 4  |
|  | SU “Multiple disabilities” AND AB (“AAC” OR “Augmentative and Alternative Communication”) – (peer-reviewed as limiter)                     | 13 |

|                        |                                                                                                                                               |    |
|------------------------|-----------------------------------------------------------------------------------------------------------------------------------------------|----|
|                        | SU "Multiple disabilities" AND TI ("Speech Generating Device" OR "SGD" OR "voice output communication aid") – (peer-reviewed as limiter)      | 2  |
|                        | SU "Multiple disabilities" AND AB ("Speech Generating Device" OR "SGD" OR "voice output communication aid") – (peer-reviewed as limiter)      | 7  |
|                        | SU "Multiple disabilities" AND TI ("mobile technology" OR "iPad" OR "tablet") – (peer-reviewed as limiter)                                    | 1  |
|                        | SU "Multiple disabilities" AND AB ("mobile technology" OR "iPad" OR "tablet")- (peer-reviewed as limiter)                                     | 1  |
| <b>LLBA (ProQuest)</b> | SU("Developmental Disabilities") AND TI("AAC" OR "Augmentative and Alternative Communication") – (peer-reviewed as limiter)                   | 53 |
|                        | SU("Developmental Disabilities") AND AB("AAC" OR "Augmentative and Alternative Communication") – (peer-reviewed as limiter)                   | 73 |
|                        | SU("Developmental disabilities") AND TI("Speech Generating Device" OR "SGD" OR "voice output communication aid") - (peer-reviewed as limiter) | 5  |
|                        | SU("Developmental disabilities") AND AB("Speech Generating Device" OR "SGD" OR "voice output communication aid") - (peer-reviewed as limiter) | 15 |
|                        | SU("Developmental disabilities") AND TI("mobile technology" OR "iPad" OR "tablet") - ( peer-reviewed as limiter)                              | 4  |
|                        | SU("Developmental disabilities") AND AB("mobile technology" OR "iPad" OR "tablet") - ( peer-reviewed as limiter)                              | 8  |
|                        |                                                                                                                                               |    |
|                        | SU("Mental Retardation") AND TI("AAC" OR "Augmentative and Alternative Communication") – (peer-reviewed as limiter)                           | 10 |
|                        | SU("Mental Retardation") AND AB("AAC" OR "Augmentative and Alternative Communication") – (peer-reviewed as limiter)                           | 21 |
|                        | SU("Mental Retardation") AND TI("Speech Generating Device" OR "SGD" OR "voice output communication aid") - (peer-reviewed as limiter)         | 0  |
|                        | SU("Mental Retardation") AND AB("Speech Generating Device" OR "SGD" OR "voice output communication aid")- (peer-reviewed as limiter))         | 2  |
|                        | SU("Mental Retardation") AND TI("mobile technology" OR "iPad" OR "tablet")- (peer-reviewed as limiter)                                        | 1  |

|  |                                                                                                                                   |    |
|--|-----------------------------------------------------------------------------------------------------------------------------------|----|
|  | SU("Mental Retardation") AND AB("mobile technology" OR "iPad" OR "tablet")- (peer-reviewed as limiter)                            | 4  |
|  | SU("Down syndrome") AND TI("AAC" OR "Augmentative and Alternative Communication") – (peer-reviewed as limiter)                    | 12 |
|  | SU("Down syndrome") AND AB("AAC" OR "Augmentative and Alternative Communication")– (peer reviewed as limiter)                     | 17 |
|  | SU("Down syndrome") AND TI("Speech Generating Device" OR "SGD" OR "voice output communication aid") - (peer-reviewed as limiter)  | 0  |
|  | SU("Down syndrome") AND AB("Speech Generating Device" OR "SGD" OR "voice output communication aid")- (peer-reviewed as limiter)   | 1  |
|  | SU("Down syndrome") AND TI("mobile technology" OR "iPad" OR "tablet") - (peer-reviewed as limiter)                                | 0  |
|  | SU("Down syndrome") AND AB("mobile technology" OR "iPad" OR "tablet")- (peer-reviewed as limiter)                                 | 2  |
|  | SU("Rett syndrome") AND TI("AAC" OR "Augmentative and Alternative Communication")– (peer-reviewed as limiter)                     | 0  |
|  | SU("Rett syndrome") AND AB("AAC" OR "Augmentative and Alternative Communication") – (peer-reviewed as limiter)                    | 3  |
|  | SU("Rett syndrome") AND TI("Speech Generating Device" OR "SGD" OR "voice output communication aid")- (peer-reviewed as limiter)   | 0  |
|  | SU("Rett syndrome") AND AB("Speech Generating Device" OR "SGD" OR "voice output communication aid")- (peer-reviewed as limiter)   | 0  |
|  | SU("Rett syndrome") AND TI("mobile technology" OR "iPad" OR "tablet")- (peer-reviewed as limiter)                                 | 0  |
|  | SU("Rett syndrome") AND AB("mobile technology" OR "iPad" OR "tablet")- (peer-reviewed as limiter)                                 | 0  |
|  | SU("Cerebral palsy") AND TI("AAC" OR "Augmentative and Alternative Communication")- (peer-reviewed as limiter)                    | 35 |
|  | SU("Cerebral palsy") AND AB("AAC" OR "Augmentative and Alternative Communication") - (peer-reviewed as limiter)                   | 55 |
|  | SU("Cerebral palsy") AND TI("Speech Generating Device" OR "SGD" OR "voice output communication aid") - (peer-reviewed as limiter) | 0  |

|  |                                                                                                                                                   |   |
|--|---------------------------------------------------------------------------------------------------------------------------------------------------|---|
|  | SU("Cerebral palsy") AND AB("Speech Generating Device" OR "SGD" OR "voice output communication aid") - (peer-reviewed as limiter)                 | 7 |
|  | SU("Cerebral palsy") AND TI("mobile technology" OR "iPad" OR "tablet") - (peer-reviewed as limiter)                                               | 1 |
|  | SU("Cerebral palsy") AND AB("mobile technology" OR "iPad" OR "tablet") - (peer-reviewed as limiter)                                               | 2 |
|  | SU("Fragile X Syndrome") AND TI("AAC" OR "Augmentative and Alternative Communication") - (peer-reviewed as limiter)                               | 0 |
|  | SU("Fragile X Syndrome") AND AB("AAC" OR "Augmentative and Alternative Communication") - (peer-reviewed as limiter)                               | 1 |
|  | SU("Fragile X Syndrome") AND TI("Speech Generating Device" OR "SGD" OR "voice output communication aid") - (peer-reviewed as limiter)             | 0 |
|  | SU("Fragile X Syndrome") AND AB("Speech Generating Device" OR "SGD" OR "voice output communication aid") - (peer-reviewed as limiter)             | 0 |
|  | SU("Fragile X Syndrome") AND TI("mobile technology" OR "iPad" OR "tablet")- (peer-reviewed as limiter)                                            | 0 |
|  | SU("Fragile X Syndrome") AND AB("mobile technology" OR "iPad" OR "tablet")- (peer-reviewed as limiter)                                            | 0 |
|  |                                                                                                                                                   |   |
|  | SU("Speech and Language Impairment") AND TI("AAC" OR "Augmentative and Alternative Communication") - (peer-reviewed as limiter)                   | 0 |
|  | SU("Speech and Language Impairment") AND AB("AAC" OR "Augmentative and Alternative Communication") - (peer-reviewed as limiter)                   | 0 |
|  | SU("Speech and Language Impairment") AND TI("Speech Generating Device" OR "SGD" OR "voice output communication aid") - (peer-reviewed as limiter) | 0 |
|  | SU("Speech and Language Impairment") AND AB("Speech Generating Device" OR "SGD" OR "voice output communication aid") - (peer-reviewed as limiter) | 0 |
|  | SU("Speech and Language Impairment") AND TI("mobile technology" OR "iPad" OR "tablet") - (peer-reviewed as limiter)                               | 0 |
|  | SU("Speech and Language Impairment") AND AB("mobile technology" OR "iPad" OR "tablet")- (peer-reviewed as limiter)                                | 0 |



|  |                                                                                                                                            |   |
|--|--------------------------------------------------------------------------------------------------------------------------------------------|---|
|  | SU("Apraxia of Speech") AND TI("AAC" OR "Augmentative and Alternative Communication") - (peer-reviewed as limiter)                         | 1 |
|  | SU("Apraxia of Speech") AND AB("AAC" OR "Augmentative and Alternative Communication") - (peer-reviewed as limiter)                         | 1 |
|  | SU("Apraxia of Speech") AND TI("Speech Generating Device" OR "SGD" OR "voice output communication aid") - (peer-reviewed as limiter)       | 0 |
|  | SU("Apraxia of Speech") AND AB("Speech Generating Device" OR "SGD" OR "voice output communication aid") - (peer-reviewed as limiter)       | 0 |
|  | SU("Apraxia of Speech") AND TI("mobile technology" OR "iPad" OR "tablet") - (peer-reviewed as limiter)                                     | 0 |
|  | SU("Apraxia of Speech") AND AB("mobile technology" OR "iPad" OR "tablet") - (peer-reviewed as limiter)                                     | 0 |
|  | SU("Intellectual disability") AND TI("AAC" OR "Augmentative and Alternative Communication") - (peer-reviewed as limiter)                   | 4 |
|  | SU("Intellectual disability") AND AB("AAC" OR "Augmentative and Alternative Communication") - (peer-reviewed as limiter)                   | 6 |
|  | SU("Intellectual disability") AND TI("Speech Generating Device" OR "SGD" OR "voice output communication aid") - (peer-reviewed as limiter) | 0 |
|  | SU("Intellectual disability") AND AB("Speech Generating Device" OR "SGD" OR "voice output communication aid") - (peer-reviewed as limiter) | 0 |
|  | SU("Intellectual disability") AND TI("mobile technology" OR "iPad" OR "tablet") - (peer-reviewed as limiter)                               | 0 |
|  | SU("Intellectual disability") AND AB("mobile technology" OR "iPad" OR "tablet") - (peer-reviewed as limiter)                               | 0 |
|  | SU("Profound disabilities") AND TI("AAC" OR "Augmentative and Alternative Communication") - (peer-reviewed as limiter)                     | 0 |
|  | SU("Profound disabilities") AND AB("AAC" OR "Augmentative and Alternative Communication") - (peer-reviewed as limiter)                     | 0 |
|  | SU("Profound disabilities") AND TI("Speech Generating Device" OR "SGD" OR "voice output communication aid") - (peer-reviewed as limiter)   | 0 |

|                            |                                                                                                                                               |    |
|----------------------------|-----------------------------------------------------------------------------------------------------------------------------------------------|----|
|                            | SU("Profound disabilities") AND AB("Speech Generating Device" OR "SGD" OR "voice output communication aid") - (peer-reviewed as limiter)      | 0  |
|                            | SU("Profound disabilities") AND TI("mobile technology" OR "iPad" OR "tablet") - (peer-reviewed as limiter)                                    | 0  |
|                            | SU("Profound disabilities") AND AB("mobile technology" OR "iPad" OR "tablet")- (peer-reviewed as limiter)                                     | 0  |
|                            | SU("Multiple disabilities") AND TI("AAC" OR "Augmentative and Alternative Communication") - (peer-reviewed as limiter)                        | 2  |
|                            | SU("Multiple disabilities") AND AB("AAC" OR "Augmentative and Alternative Communication") - (peer-reviewed as limiter)                        | 3  |
|                            | SU("Multiple disabilities") AND TI("Speech Generating Device" OR "SGD" OR "voice output communication aid") - (peer-reviewed as limiter)      | 0  |
|                            | SU("Multiple disabilities") AND AB("Speech Generating Device" OR "SGD" OR "voice output communication aid") - (peer-reviewed as limiter)      | 1  |
|                            | SU("Multiple disabilities") AND TI("mobile technology" OR "iPad" OR "tablet") - (peer-reviewed as limiter)                                    | 0  |
|                            | SU("Multiple disabilities") AND AB("mobile technology" OR "iPad" OR "tablet")- (peer-reviewed as limiter)                                     | 0  |
| <b>MEDLINE (EBSCOhost)</b> | SU "Developmental Disabilities" AND TI ("AAC" OR "Augmentative and Alternative Communication") – (peer-reviewed as limiter)                   | 38 |
|                            | SU "Developmental Disabilities" AND AB ("AAC" OR "Augmentative and Alternative Communication") – (peer reviewed as limiter)                   | 54 |
|                            | SU "Developmental disabilities" AND TI ("Speech Generating Device" OR "SGD" OR "voice output communication aid") - (peer-reviewed as limiter) | 5  |
|                            | SU "Developmental disabilities" AND AB ("Speech Generating Device" OR "SGD" OR "voice output communication aid") - (peer-reviewed as limiter) | 16 |
|                            | SU "Developmental disabilities" AND TI ("mobile technology" OR "iPad" OR "tablet") - (peer-reviewed as limiter)                               | 6  |
|                            | SU "Developmental disabilities" AND AB ("mobile technology" OR "iPad" OR "tablet") - (peer-reviewed as limiter)                               | 24 |

|  |                                                                                                                                        |    |
|--|----------------------------------------------------------------------------------------------------------------------------------------|----|
|  | SU "Mental Retardation" AND TI ("AAC" OR "Augmentative and Alternative Communication") – (peer-reviewed as limiter)                    | 1  |
|  | SU "Mental Retardation" AND AB ("AAC" OR "Augmentative and Alternative Communication") – (peer reviewed as limiter)                    | 1  |
|  | SU "Mental Retardation" AND TI ("Speech Generating Device" OR "SGD" OR "voice output communication aid") - (peer-reviewed as limiter)  | 0  |
|  | SU "Mental Retardation" AND AB ("Speech Generating Device" OR "SGD" OR "voice output communication aid") - (peer-reviewed as limiter)) | 0  |
|  | SU "Mental Retardation" AND TI ("mobile technology" OR "iPad" OR "tablet") - (peer-reviewed as limiter)                                | 0  |
|  | SU "Mental retardation" AND AB ("mobile technology" OR "iPad" OR "tablet")- (peer-reviewed as limiter)                                 | 1  |
|  | SU "Down syndrome" AND TI ("AAC" OR "Augmentative and Alternative Communication") – (peer-reviewed as limiter)                         | 8  |
|  | SU "Down syndrome" AND AB ("AAC" OR "Augmentative and Alternative Communication") – (peer reviewed as limiter)                         | 17 |
|  | SU "Down syndrome" AND TI ("Speech Generating Device" OR "SGD" OR "voice output communication aid") - (peer-reviewed as limiter)       | 0  |
|  | SU "Down syndrome" AND AB ("Speech Generating Device" OR "SGD" OR "voice output communication aid") - (peer-reviewed as limiter)       | 2  |
|  | SU "Down Syndrome" AND TI ("mobile technology" OR "iPad" OR "tablet") - (peer-reviewed as limiter)                                     | 0  |
|  | SU "Down Syndrome" AND AB ("mobile technology" OR "iPad" OR "tablet")- (peer-reviewed as limiter)                                      | 7  |
|  | SU "Rett syndrome" AND TI ("AAC" OR "Augmentative and Alternative Communication") – (peer-reviewed as limiter)                         | 1  |
|  | SU "Rett syndrome" AND AB ("AAC" OR "Augmentative and Alternative Communication") – (peer-reviewed as limiter)                         | 8  |
|  | SU "Rett syndrome" AND TI ("Speech Generating Device" OR "SGD" OR "voice output communication aid") - (peer-reviewed as limiter)       | 0  |
|  | SU "Rett syndrome" AND AB ("Speech Generating Device" OR "SGD" OR "voice output communication aid")- (peer-reviewed as limiter)        | 0  |

|  |                                                                                                                                       |    |
|--|---------------------------------------------------------------------------------------------------------------------------------------|----|
|  | SU "Rett Syndrome" AND TI ("mobile technology" OR "iPad" OR "tablet") - (peer-reviewed as limiter)                                    | 0  |
|  | SU "Rett Syndrome" AND AB ("mobile technology" OR "iPad" OR "tablet")- (peer-reviewed as limiter)                                     | 0  |
|  | SU "Cerebral palsy" AND TI ("AAC" OR "Augmentative and Alternative Communication") - (peer-reviewed as limiter)                       | 44 |
|  | SU "Cerebral palsy" AND AB ("AAC" OR "Augmentative and Alternative Communication") - (peer-reviewed as limiter)                       | 77 |
|  | SU "Cerebral Palsy" AND TI ("Speech Generating Device" OR "SGD" OR "voice output communication aid") - (peer-reviewed as limiter)     | 2  |
|  | SU "Cerebral Palsy" AND AB ("Speech Generating Device" OR "SGD" OR "voice output communication aid") - (peer-reviewed as limiter)     | 17 |
|  | SU "Cerebral Palsy" AND TI ("mobile technology" OR "iPad" OR "tablet") - (peer-reviewed as limiter)                                   | 1  |
|  | SU "Cerebral Palsy" AND AB ("mobile technology" OR "iPad" OR "tablet")- (peer-reviewed as limiter)                                    | 11 |
|  | SU "Fragile X Syndrome" AND TI ("AAC" OR "Augmentative and Alternative Communication") - (peer-reviewed as limiter)                   | 1  |
|  | SU "Fragile X Syndrome" AND AB ("AAC" OR "Augmentative and Alternative Communication") - (peer-reviewed as limiter)                   | 3  |
|  | SU "Fragile X Syndrome" AND TI ("Speech Generating Device" OR "SGD" OR "voice output communication aid") - (peer-reviewed as limiter) | 0  |
|  | SU "Fragile X Syndrome" AND AB ("Speech Generating Device" OR "SGD" OR "voice output communication aid") - (peer-reviewed as limiter) | 0  |
|  | SU "Fragile X Syndrome" AND TI ("mobile technology" OR "iPad" OR "tablet")- (peer-reviewed as limiter)                                | 1  |
|  | SU "Fragile X Syndrome" AND AB ("mobile technology" OR "iPad" OR "tablet")- (peer-reviewed as limiter)                                | 5  |
|  | SU "Speech and Language Impairment" AND TI ("AAC" OR "Augmentative and Alternative Communication") - (peer-reviewed as limiter)       | 0  |
|  | SU "Speech and Language Impairment" AND AB ("AAC" OR "Augmentative and Alternative Communication") - (peer-reviewed as limiter)       | 0  |
|  | SU "Speech and Language Impairment" AND TI ("Speech Generating Device" OR "SGD" OR "voice                                             | 0  |

|  |                                                                                                                                                   |    |
|--|---------------------------------------------------------------------------------------------------------------------------------------------------|----|
|  | output communication aid”) - (peer-reviewed as limiter)                                                                                           |    |
|  | SU “Speech and Language Impairment” AND AB (“Speech Generating Device” OR “SGD” OR “voice output communication aid”) - (peer-reviewed as limiter) | 0  |
|  | SU “Speech and Language Impairment” AND TI (“mobile technology” OR “iPad” OR “tablet”)- (peer-reviewed as limiter)                                | 0  |
|  | SU “Speech and Language Impairment” AND AB (“mobile technology” OR “iPad” OR “tablet”)- (peer-reviewed as limiter)                                | 0  |
|  | SU “Apraxia of Speech” AND TI (“AAC” OR “Augmentative and Alternative Communication”) - (peer-reviewed as limiter)                                | 1  |
|  | SU “Apraxia of Speech” AND AB (“AAC” OR “Augmentative and Alternative Communication”) - (peer-reviewed as limiter)                                | 2  |
|  | SU “Apraxia of Speech” AND TI (“Speech Generating Device” OR “SGD” OR “voice output communication aid”) - (peer-reviewed as limiter)              | 0  |
|  | SU “Apraxia of Speech” AND AB (“Speech Generating Device” OR “SGD” OR “voice output communication aid”) - (peer-reviewed as limiter)              | 1  |
|  | SU “Apraxia of Speech” AND TI (“mobile technology” OR “iPad” OR “tablet”) - (peer-reviewed as limiter)                                            | 1  |
|  | SU “Apraxia of Speech” AND AB (“mobile technology” OR “iPad” OR “tablet”)- (peer-reviewed as limiter)                                             | 1  |
|  | SU “Intellectual disability” AND TI (“AAC” OR “Augmentative and Alternative Communication”) - (peer-reviewed as limiter)                          | 21 |
|  | SU “Intellectual disability” AND AB (“AAC” OR “Augmentative and Alternative Communication”) - (peer-reviewed as limiter)                          | 44 |
|  | SU “Intellectual disability” AND TI (“Speech Generating Device” OR “SGD” OR “voice output communication aid”) - (peer-reviewed as limiter)        | 2  |
|  | SU “Intellectual disability” AND AB (“Speech Generating Device” OR “SGD” OR “voice output communication aid”) - (peer-reviewed as limiter)        | 11 |
|  | SU “Intellectual disability” AND TI (“mobile technology” OR “iPad” OR “tablet”) - (peer-reviewed as limiter)                                      | 10 |

|  |                                                                                                                                          |    |
|--|------------------------------------------------------------------------------------------------------------------------------------------|----|
|  | SU "Intellectual disability" AND AB ("mobile technology" OR "iPad" OR "tablet") - (peer-reviewed as limiter)                             | 31 |
|  | SU "Profound disabilities" AND TI ("AAC" OR "Augmentative and Alternative Communication") - (peer-reviewed as limiter)                   | 0  |
|  | SU "Profound disabilities" AND AB ("AAC" OR "Augmentative and Alternative Communication") - (peer-reviewed as limiter)                   | 0  |
|  | SU "Profound disabilities" AND TI ("Speech Generating Device" OR "SGD" OR "voice output communication aid") - (peer-reviewed as limiter) | 0  |
|  | SU "Profound disabilities" AND AB ("Speech Generating Device" OR "SGD" OR "voice output communication aid") - (peer-reviewed as limiter) | 0  |
|  | SU "Profound disabilities" AND TI ("mobile technology" OR "iPad" OR "tablet") - (peer-reviewed as limiter)                               | 0  |
|  | SU "Profound disabilities" AND AB ("mobile technology" OR "iPad" OR "tablet")- (peer-reviewed as limiter)                                | 0  |
|  | SU "Multiple disabilities" AND TI ("AAC" OR "Augmentative and Alternative Communication") - (peer-reviewed as limiter)                   | 3  |
|  | SU "Multiple disabilities" AND AB ("AAC" OR "Augmentative and Alternative Communication") - (peer-reviewed as limiter)                   | 5  |
|  | SU "Multiple disabilities" AND TI ("Speech Generating Device" OR "SGD" OR "voice output communication aid") - (peer-reviewed as limiter) | 0  |
|  | SU "Multiple disabilities" AND AB ("Speech Generating Device" OR "SGD" OR "voice output communication aid") - (peer-reviewed as limiter) | 2  |
|  | SU "Multiple disabilities" AND TI ("mobile technology" OR "iPad" OR "tablet") - (peer-reviewed as limiter)                               | 0  |
|  | SU "Multiple disabilities" AND AB ("mobile technology" OR "iPad" OR "tablet")- (peer-reviewed as limiter)                                | 1  |
